# Supplementary material for: Molecular identification and functional characterization of the first Nα-acetyltransferase in plastids by global acetylome profiling
Source: PubMed Central journal article supplement (PMC4692087; doi:10.1002/pmic.201500025), 2015-06-18
Supplement: pmic0015-2426-sd4.pdf [file pmic0015-2426-sd4.pdf]

# PROTEOMICS

## Supporting Information for Proteomics

DOI 10.1002/pmic.201500025

Trinh V. Dinh, Willy V. Bienvenut, Eric Linster, Anna Feldman-Salit, Vincent A. Jung,  
Thierry Meinel, Rüdiger Hell, Carmela Giglione and Markus Wirtz

**Molecular identification and functional characterization of the first  
N $\alpha$ -acetyltransferase in plastids by global acetylome profiling**

**Supplemental Table 1. List of primers for cloning of cDNAs**

| <b>Name</b>        | <b>Sequence</b>                          | <b>Description</b>         |
|--------------------|------------------------------------------|----------------------------|
| At2g39000_EYFP_F   | 5'-GATCGGATCCATGCGGAGCACACCGTT-3'        | Cloning into<br>pFF19-EYFP |
| At2g39000_EYFP_R   | 5'-GATCGTCGACCCGAAACTGTTCAAGAGCTTG-3'    |                            |
| At2g39000_pETM41_F | 5'-CCATGGACGCAAGTCAAATAGTTGATCTTTTTCC-3' | Cloning into<br>pETM41     |
| At2g39000_pETM41_R | 5'-GGATCCTTACCGAAACTGTTCAAGAGCTTG-3'     |                            |
