# Supplementary material for: Molecular identification and functional characterization of the first Nα-acetyltransferase in plastids by global acetylome profiling
Source: PubMed Central journal article supplement (PMC4692087; doi:10.1002/pmic.201500025), 2015-06-18
Supplement: pmic0015-2426-sd5.pdf [file pmic0015-2426-sd5.pdf]

# PROTEOMICS

## Supporting Information for Proteomics

DOI 10.1002/pmic.201500025

Trinh V. Dinh, Willy V. Bienvenut, Eric Linster, Anna Feldman-Salit, Vincent A. Jung,  
Thierry Meinel, Rüdiger Hell, Carmela Giglione and Markus Wirtz

**Molecular identification and functional characterization of the first  
N $\alpha$ -acetyltransferase in plastids by global acetylome profiling**

**Supplemental Table 2 Potential Arabidopsis Nats that are predicted to be localized in plastids**

cTP, chloroplastidic transit peptide, mTP, mitochondrial transit peptide, SUBA, subcellular localization of proteins in Arabidopsis database

| No. | Locus     | Predicted localization according to SUBA | TargetP score             | cTP cleavage site prediction by TargetP |
|-----|-----------|------------------------------------------|---------------------------|-----------------------------------------|
| 1   | At1g24040 | Chloroplast                              | cTP : 0.963               | 55                                      |
| 2   | At2g06025 | Chloroplast,<br>Mitochondrion            | cTP: 0.468,<br>mTP: 0.672 | 111                                     |
| 3   | At4g28030 | Chloroplast                              | cTP: 0.843                | 65                                      |
| 4   | At2g39000 | Chloroplast                              | cTP: 0.928                | 61                                      |
| 5   | At4g19985 | Chloroplast,<br>Mitochondrion            | cTP: 0.102,<br>mTP: 0.598 | 93                                      |
| 6   | At1g26220 | Chloroplast,<br>Mitochondrion            | cTP: 0.695,<br>mTP: 0.556 | 37                                      |
| 7   | At1g32070 | Chloroplast                              | cTP: 0.972                | 58                                      |
